# Supplementary material for: Development and validation of a risk index to predict kidney graft survival: the Kidney Transplant Risk Index
Source: Research Square preprint supplement (doi:10.21203/rs.3.rs-272583/v1), 2021-03-04
Supplement: Supplementary file 1 [file 588863f534a6e0b623492455.pdf]

## Supplementary material

### *Development and validation of a risk index to predict kidney graft survival: the Kidney Transplant Risk Index*

Sameera Senanayake<sup>1</sup>; Sanjeewa Kularatna<sup>1</sup>; Helen Healy<sup>2,3</sup>; Nicholas Graves<sup>4</sup>; Keshwar Baboolal<sup>2,3</sup>; Matthew P. Sypek<sup>5</sup>; Adrian Barnett<sup>1</sup>

<sup>1</sup> Australian Centre for Health Services Innovation (AusHSI) and Centre for Healthcare Transformation, School of Public Health & Social Work, Queensland University of Technology (QUT), Brisbane, Queensland, Australia

<sup>2</sup> Royal Brisbane Hospital for Women, Brisbane, Australia

<sup>3</sup> School of Medicine, University of Queensland, Australia

<sup>4</sup> Duke-NUS Medical School, Singapore

<sup>5</sup> Australia and New Zealand Dialysis and Transplant (ANZDATA) Registry, Adelaide, South Australia, Australia

#### **ORCID IDs**

|                    |                       |
|--------------------|-----------------------|
| Sameera Senanayake | - 0000-0002-5606-2046 |
| Nicholas Graves    | - 0000-0002-5559-3267 |
| Helen Healy        | - 0000-0003-4342-5300 |
| Keshwar Baboolal   | - 0000-0002-3688-9353 |
| Adrian Barnett     | - 0000-0001-6339-0374 |
| Sanjeewa Kularatna | - 0000-0001-5650-154X |

#### **Corresponding author**

*Sameera Senanayake*

Australian Centre for Health Services Innovation,  
Queensland University of Technology,  
60 Musk Ave, Kelvin Grove, QLD 4059, Australia

[s2.senanayake@qut.edu.au](mailto:s2.senanayake@qut.edu.au)

[+61450865361](tel:+61450865361)

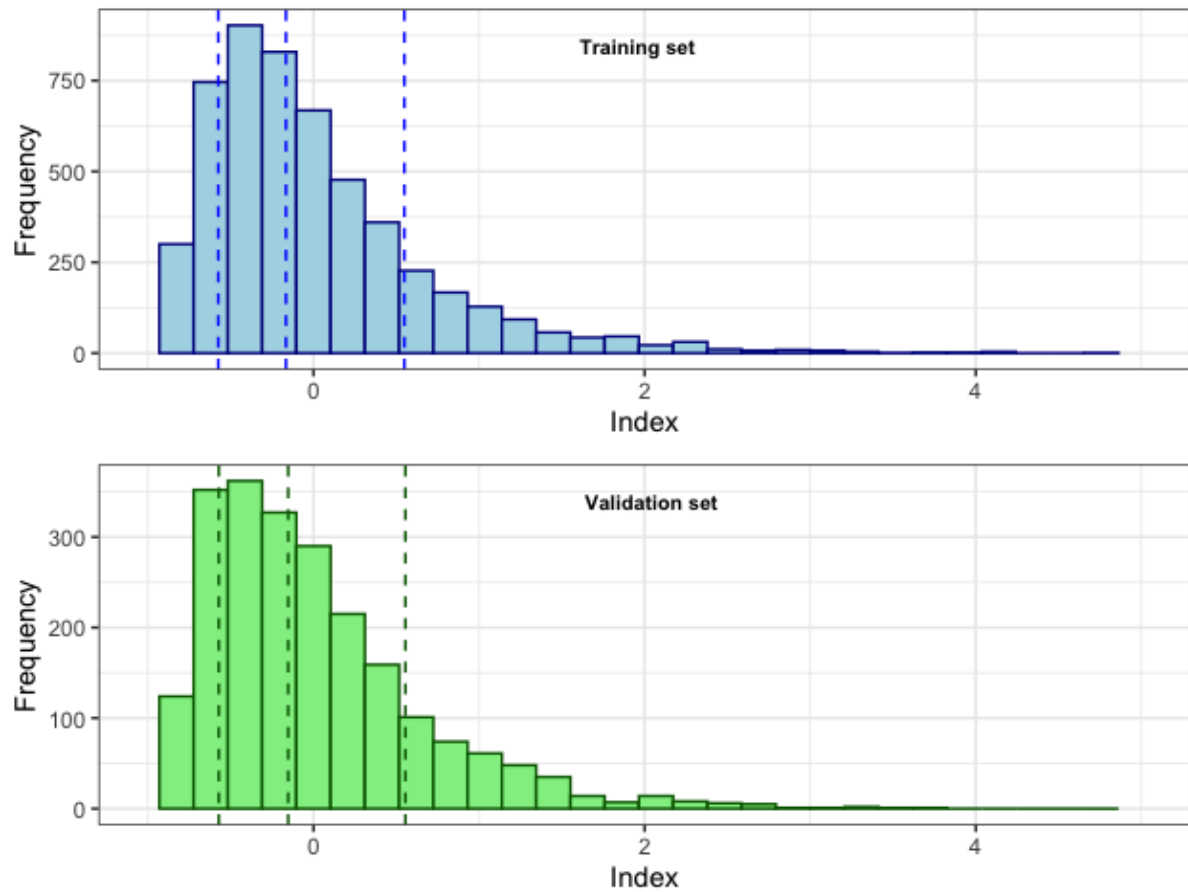

**Supplementary figure 1** : Histogram of the index in the training and validation datasets of the best fitting Cox model.

*The index was centered on the mean in the training dataset. The vertical lines show the 16th, 50th and 84th centiles of the index in each dataset.*
